# Supplementary material
Source: PubMed Central journal article supplement (PMC8765321)
Supplement: aac.01196-21-s0001.pdf [file aac.01196-21-s0001.pdf]

## **Supplemental Contents**

Supplemental Methods

Supplemental Figure 1

Supplemental Table 1

Supplemental Table 2

Supplemental Table 3

Supplemental Table 4

Supplemental Table 5 (separate Excel file)

## Supplemental Methods

### *Isolate collection*

Diagnostic specimens (*e.g.* blood, urine, intra-abdominal sites, wounds) were cultured with specimen-specific standard protocols (1). Vancomycin-resistant enterococci (VRE) surveillance specimens (rectal swabs or stool) were cultured on selective and differential chromogenic medium, then subcultured onto blood agar plates. For each isolate, a sterile inoculating loop was used to collect multiple colonies from a pure subculture of the bacterial inoculation suspension used to setup VITEK 2 testing. The loop was placed directly into 100  $\mu$ L of a Tris-HCl buffered Trizol lysis solution containing 200 mg of sterile 0.1 mm glass beads. For isolates collected after April 2017, the loop was first dipped into sterile LB-glycerol media prior to placement into the Trizol lysis solution to enable future phenotypic studies.

### *DNA extraction from isolates*

Bacterial isolates collected in 100  $\mu$ L of buffered Trizol were mixed with 100  $\mu$ L of Tris-HCl buffer with EDTA, 40 $\mu$ L of sodium dodecyl sulfate, and 100  $\mu$ L of phenol-chloroform-isoamyl alcohol, incubated for 10 minutes at 4°C, bead beat for one minute, and centrifuged at 2,800 x g. DNA was purified from 50  $\mu$ L of the aqueous phase using the Qiagen QIAmp 96 DNA kit.

### *Details of rule-based method*

Ampicillin resistance was predicted if *pbp5* did not contain 485M. Vancomycin resistance was predicted if *vanA* or *vanB* was present (determined with SRST2 criteria above). High-level gentamicin resistance was predicted if the complete *aac(6')-Ie-aph(2'')-Ia* gene was detected (*e.g.* a common alignment containing 129 holes was not considered complete.) Ciprofloxacin and

levofloxacin resistance were predicted if mutations in *gyrA* 84S or *parC* 82S were present.

Tetracycline resistance was predicted if *tetL*, *tetM*, or *tetS* were detected by SRST2 with any number of differences from the reference sequences. Doxycycline resistance was predicted if *tetM* was detected by SRST2 with any number of differences from the reference sequence.

Linezolid resistance was predicted if 23S *rRNA* G2576T was present in at least 3 alleles. For each drug, if resistance criteria were not met, the isolate was considered susceptible to the drug.

**Supplemental Figure 1.** GoeBURST visualization of isolates from this study superimposed on the background population structure of all 1,318 clinical *E. faecium* isolates deposited in PubMLST at the time of this analysis. Over 92% of derivation set isolates and 85% of validation set isolates belonged to CC17 and were most frequently ST-736, ST-18, ST-412, ST-17, and ST-117. Two locally common but novel STs, ST-1578 and ST-1579, are annotated with an asterisk. Group and sub-group founders are labeled with their sequence type (ST). Node colors represent whether the ST is present in the derivation set (red), validation set (blue), both sets (pie chart; e.g. 30% of ST-736 isolates were in the derivation set), or neither set (grey, exclusively found in PubMLST). Node size is proportional to the number of isolates belonging to that ST.

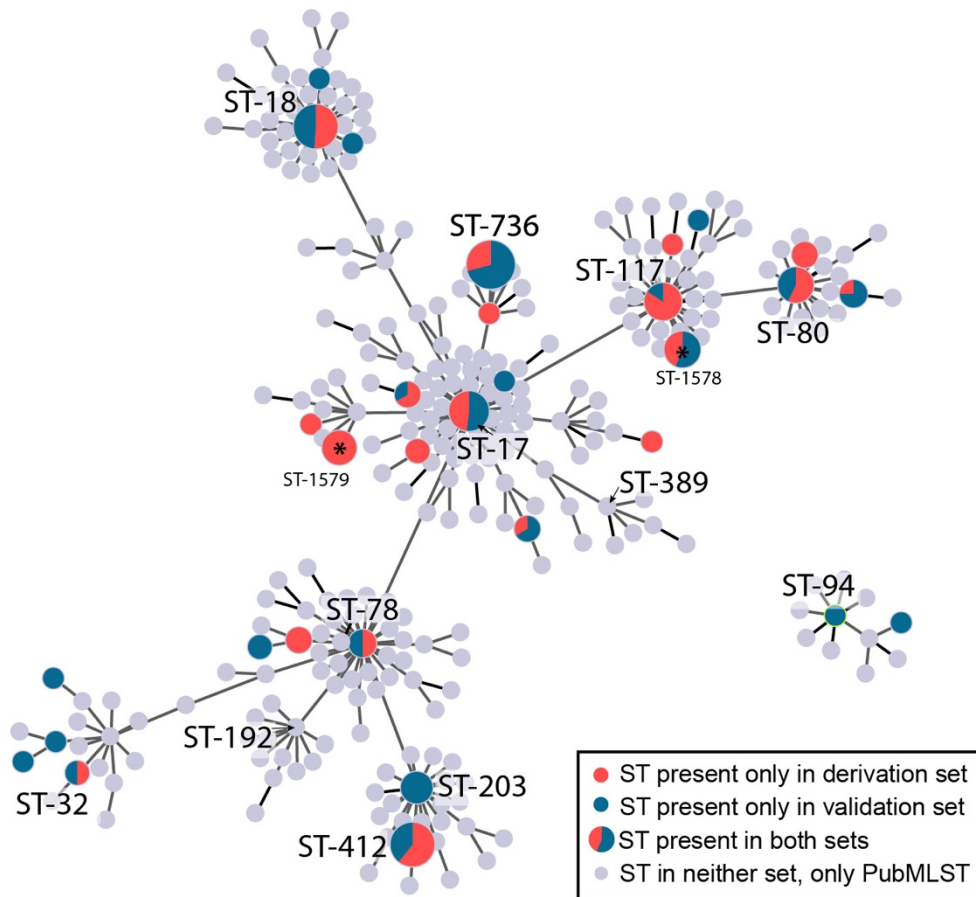

**Supplemental Table 1. Novel MLST profiles, frequency, and source.** SRST2 was used to assign allele numbers. Asterisks indicate the closest known allele (with at least 1 mismatch). When applicable, new MLST designations as assigned by PubMLST.org are shown.

| <i>E. faecium</i> MLST allele call |            |            |             |            |             |            | Total Occurrences (Derivation, Validation) | Source (Occurrences)             | New Official MLST Designation | Closest Existing ST Type (# of matching loci out of 7) |
|------------------------------------|------------|------------|-------------|------------|-------------|------------|--------------------------------------------|----------------------------------|-------------------------------|--------------------------------------------------------|
| <b>atpA</b>                        | <b>ddl</b> | <b>gdh</b> | <b>purK</b> | <b>gyd</b> | <b>pstS</b> | <b>adk</b> |                                            |                                  |                               |                                                        |
| 9                                  | 1          | 5          | 1           | 1          | 1           | 1          | 18 (7, 11)                                 | Colonization (12), Infection (7) | ST-1578                       |                                                        |
| 1                                  | 2          | 1          | 66          | 1          | 1           | 1          | 12 (12, 0)                                 | Colonization (10), Infection (3) | ST-1579                       |                                                        |
| 7                                  | 91*        | 1          | 1           | 5          | 1           | 1          | 2 (1, 1)                                   | Colonization (2)                 |                               |                                                        |
| 70                                 | 1          | 1          | 44          | 12         | 20          | 1          | 2 (0, 2)                                   | Colonization (1), Infection (1)  | ST-2056                       | ST-412 (5/7)                                           |
| 13                                 | 8          | 8          | 8           | 23*        | 10          | 6          | 1 (1, 0)                                   | Infection (1)                    |                               |                                                        |
| 9                                  | 2          | 1          | 3           | 1          | 1           | 5          | 1 (1, 0)                                   | Infection (1)                    | ST-1577                       |                                                        |
| 11                                 | 17         | 18         | 17          | 10         | 19          | 6          | 1 (0, 1)                                   | Infection (1)                    | ST-2057                       | ST-107 (6/7)<br>ST-116 (6/7)<br>ST-931 (6/7)           |
| 15                                 | 91*        | 1          | 44          | 1          | 20          | 1          | 1 (0, 1)                                   | Infection (1)                    |                               |                                                        |
| 149                                | 8          | 116        | 23          | 6          | 27          | 6          | 1 (0, 1)                                   | Infection (1)                    | ST-2059                       | ST-1696 in CC94 (6/7)                                  |
| 5                                  | 9          | 6          | 3           | 2          | 26          | 1          | 1 (0, 1)                                   | Infection (1)                    | ST-2058                       | ST-929 (6/7)                                           |
| 1                                  | 1          | 1          | 66          | 1          | 1           | 1          | 1 (1, 0)                                   | Colonization (1)                 |                               |                                                        |
| 1                                  | 91*        | 1          | 1           | 1          | 1           | 1          | 1 (1, 0)                                   | Colonization (1)                 |                               |                                                        |
| 9                                  | 91         | 1          | 1           | 12         | 1           | 1          | 1 (1, 0)                                   | Colonization (1)                 |                               |                                                        |

**Supplemental Table 2. Van gene content of derivation and validation set isolates.**

| <b>Genotype:</b>         | <b>Vancomycin phenotype</b>   |                              |
|--------------------------|-------------------------------|------------------------------|
|                          | <b>Susceptible<br/>(n=70)</b> | <b>Resistant<br/>(n=310)</b> |
| <b><i>vanA</i></b>       | 2*                            | 300                          |
| <b><i>vanB</i></b>       | 1†                            | 11                           |
| <b><i>vanC</i></b>       | 0                             | 0                            |
| <b><i>vanD</i></b>       | 0                             | 0                            |
| <b><i>vanE</i></b>       | 0                             | 0                            |
| <b><i>vanF</i></b>       | 0                             | 0                            |
| <b><i>vanG</i></b>       | 0                             | 0                            |
| <b><i>vanL</i></b>       | 0                             | 0                            |
| <b><i>vanM</i></b>       | 0                             | 0                            |
| <b><i>vanN</i></b>       | 0                             | 0                            |
| <b>None of the above</b> | 67                            | 0                            |

\* Comprised of one isolate in the derivation set (unable to re-phenotype), and the other isolate was a vancomycin-variable enterococcus (as described in the manuscript).

† Derivation set isolate, unable to re-phenotype.

**Supplemental Table 3. Aminoglycoside resistance gene content of derivation and validation set isolates.**

| <b>Genotype:</b>                | <b>High-level gentamicin phenotype</b> |                         |
|---------------------------------|----------------------------------------|-------------------------|
|                                 | <b>Susceptible (n=337)</b>             | <b>Resistant (n=30)</b> |
| <i>aac(6')-Ie-aph(2'')-Ia</i>   | 3*                                     | 28                      |
| <i>aac(6')-Ii</i>               | 337                                    | 30                      |
| <i>ant(6')-Ia</i>               | 252                                    | 26                      |
| <i>aph(3')-Ia</i>               | 1                                      | 0                       |
| <i>aph(3')-IIIa</i>             | 234                                    | 23                      |
| <i>ant(6')-Ia -aph(3')-IIIa</i> | 0                                      | 0                       |

\* Present in derivation set, isolates unavailable for re-testing.

**Supplemental Table 4. Linezolid resistance gene content of derivation and validation set isolates.**

| <b>Genotype:</b>                              | <b>Linezolid phenotype</b>                       |                            |
|-----------------------------------------------|--------------------------------------------------|----------------------------|
|                                               | <b>Susceptible/<br/>Intermediate<br/>(n=369)</b> | <b>Resistant<br/>(n=2)</b> |
| <b>23S rRNA G2576T</b><br>in $\geq 3$ alleles | 1*                                               | 2                          |
| <b><i>poxA</i></b>                            | 1                                                | 0                          |
| <b><i>cfr(A)</i></b>                          | 0                                                | 0                          |
| <b><i>cfr(B)</i></b>                          | 1                                                | 0                          |
| <b><i>cfr(C)</i></b>                          | 0                                                | 0                          |
| <b><i>optrA</i></b>                           | 0                                                | 0                          |
| <b>None of the above</b>                      | 366                                              | 0                          |

\* A derivation set isolate that was originally tested by a disk diffusion method was not available for re-phenotyping.



**Supplemental Table 5. Sample type, MLST sequence type, phenotypic antimicrobial susceptibility testing results, antimicrobial resistance gene content, and genotypic predictions for isolates in the derivation and validation sets.** ST: Sequence Type, MIC: Minimum inhibitory concentration, RIS: Resistant, intermediate, or susceptible categorical call, Depth: average read depth determined by SRST2, Diffs: any differences in the sample sequence compared to the reference allele.

## References

1. Leber AL. Clinical microbiology procedures handbook. 2016.
